# Supplementary material
Source: publisher site journal article supplement (https://www.dovepress.com/article/565061)
Supplement: Supplementary file 1 [file 565061%20Revised%20Supplementary%20Materials.pdf]

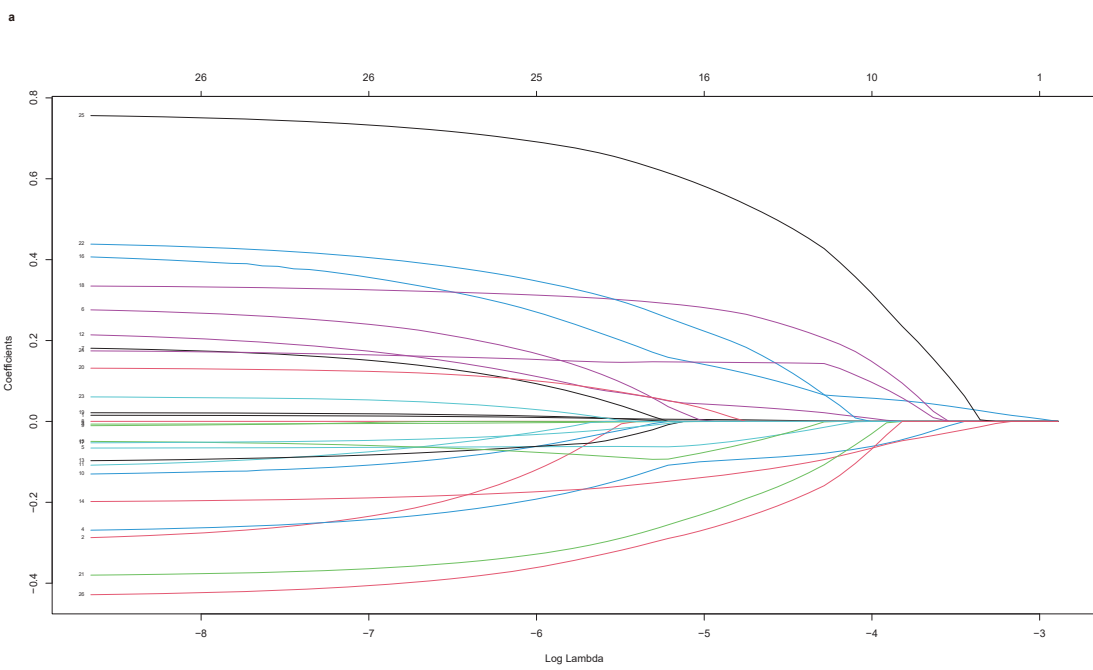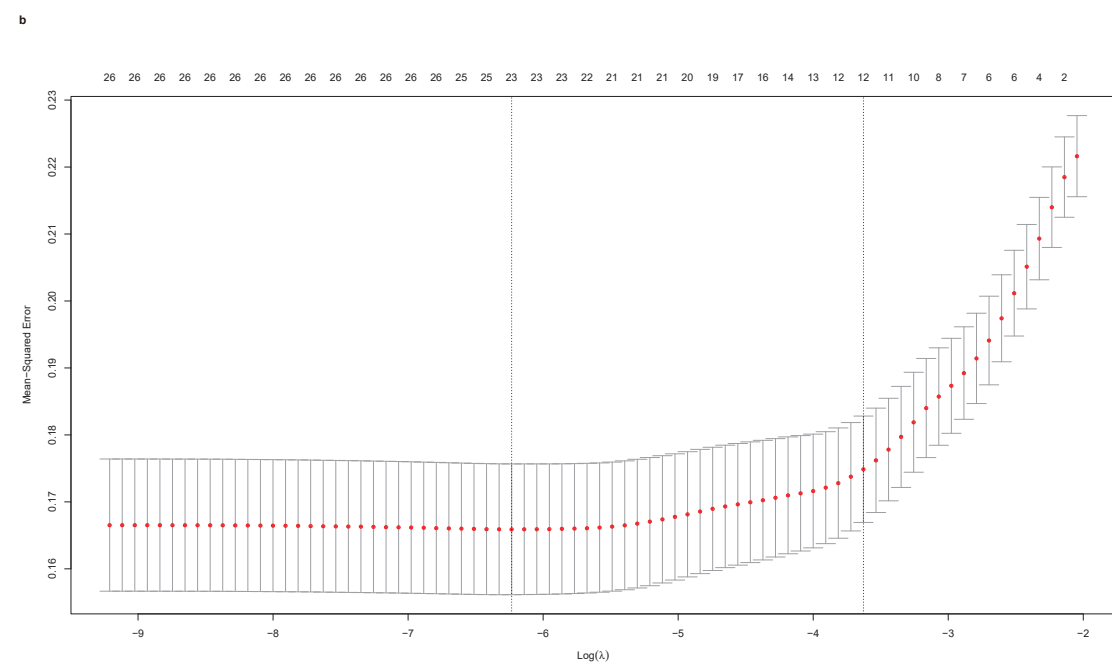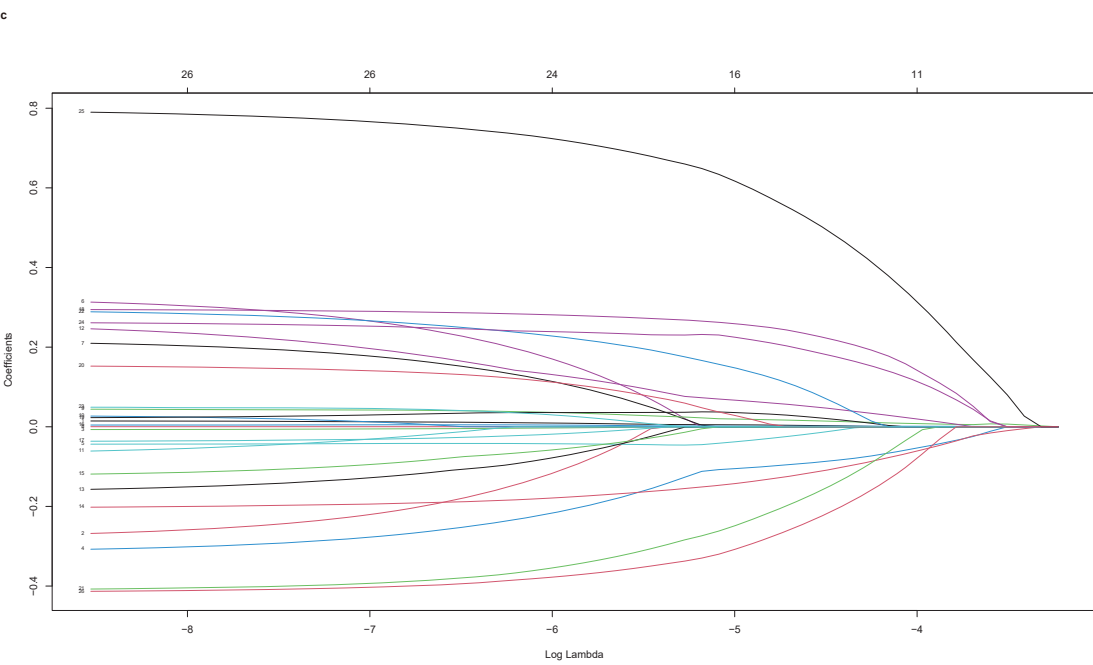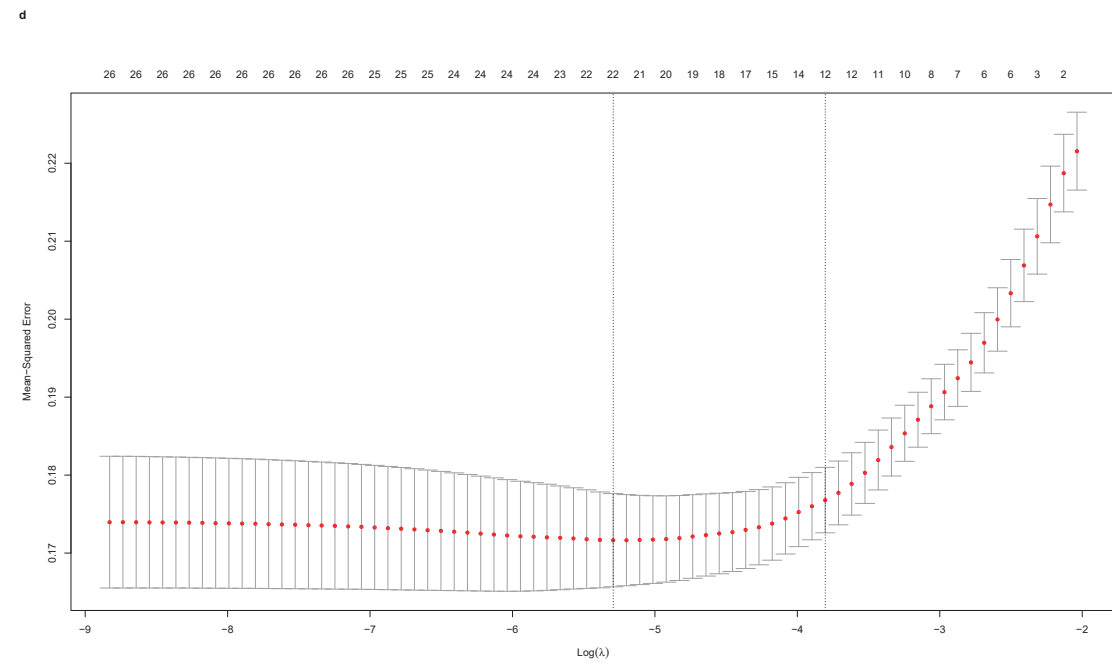

Supplementary Figure 1. Feature variable selection based on the LASSO regression analysis.

(a) Plot of the LASSO coefficient profiles in dataset without VAT. (b) Tuning parameter selection cross-validation error curve in dataset without VAT.

(c) Plot of the LASSO coefficient profiles in dataset without TFM. (d) Tuning parameter selection cross-validation error curve in dataset without TFM.

VAT: Trunk Fat Mass, TFM: Visceral Adipose Tissue.

Supplementary Table 1. Baseline characteristic of controls before and after inverse probability weighting (IPW).

| Variables                    | Before IPW               |                               |                       |                  | After IPW                   |                                  |                  |              |
|------------------------------|--------------------------|-------------------------------|-----------------------|------------------|-----------------------------|----------------------------------|------------------|--------------|
|                              | Healthy controls (n=218) | Benign breast nodules (n=212) | <i>P</i> <sup>a</sup> | SMD <sup>b</sup> | Healthy controls (n=227.64) | Benign breast nodules (n=203.47) | <i>P</i>         | SMD          |
| Age, yr                      | 65.50 (51.00, 72.00)     | 45.00 (35.00, 60.25)          | <b>&lt;0.001</b>      | <b>0.738</b>     | 67.00 (58.00, 72.00)        | 52.00 (37.00, 67.00)             | <b>&lt;0.001</b> | <b>0.639</b> |
| Menopause, n (%)             | 164 (75.23)              | 88 (41.51)                    | <b>&lt;0.001</b>      | <b>0.728</b>     | 184.4 (81.00)               | 108.0 (53.08)                    | <b>&lt;0.001</b> | <b>0.622</b> |
| BMI, kg/m <sup>2</sup>       | 23.42 (20.95, 26.25)     | 23.34 (21.02, 26.73)          | 0.795                 | 0.042            | 24.45 (21.56, 27.75)        | 24.09 (21.56, 27.07)             | 0.567            | 0.076        |
| Overweight, n (%)            | 64 (29.36)               | 58 (27.36)                    | 0.646                 | 0.044            | 69.6 (30.57)                | 65.0 (31.95)                     | 0.792            | 0.149        |
| Obesity, n (%)               | 35 (16.06)               | 34 (16.04)                    | 0.996                 | <0.001           | 55.8 (24.51)                | 37.5 (18.43)                     | 0.248            | 0.030        |
| Overweight or Obesity, n (%) | 99 (45.41)               | 92 (43.40)                    | 0.674                 | 0.041            | 125.4 (55.09)               | 102.5 (50.38)                    | 0.390            | 0.094        |
| FP, %                        | 32.35±7.88               | 31.99±6.84                    | 0.624                 | 0.047            | 33.85±8.25                  | 32.84±6.82                       | 0.213            | 0.134        |
| FM, kg                       | 19.80 (15.12, 25.00)     | 19.65 (14.57, 24.92)          | 0.690                 | 0.044            | 21.32 (16.50, 26.71)        | 20.40 (15.83, 25.60)             | 0.355            | 0.128        |
| FFM, kg                      | 40.60 (37.20, 44.18)     | 41.30 (38.58, 44.82)          | 0.066                 | 0.169            | 40.60 (37.56, 44.44)        | 41.40 (38.80, 44.90)             | 0.102            | 0.163        |
| MM, kg                       | 38.30 (34.92, 41.70)     | 38.80 (36.27, 42.32)          | 0.080                 | 0.098            | 38.30 (35.29, 41.94)        | 39.00 (36.50, 42.40)             | 0.128            | 0.083        |
| LMM, kg                      | 16.20 (14.40, 18.08)     | 16.80 (15.40, 18.52)          | <b>0.014</b>          | 0.191            | 16.20 (14.50, 18.10)        | 16.92 (15.40, 18.87)             | <b>0.019</b>     | <b>0.212</b> |
| TMM, kg                      | 21.64 (20.02, 23.19)     | 19.50 (18.00, 21.83)          | <b>&lt;0.001</b>      | <b>0.609</b>     | 21.80 (20.21, 23.21)        | 19.70 (18.10, 21.94)             | <b>&lt;0.001</b> | <b>0.617</b> |
| LFM, kg                      | 8.90 (6.72, 11.20)       | 8.25 (6.27, 10.60)            | 0.106                 | 0.151            | 9.50 (7.50, 11.91)          | 8.80 (6.72, 11.00)               | 0.061            | <b>0.249</b> |
| TFM, kg                      | 9.70 (7.50, 12.40)       | 10.40 (7.38, 13.03)           | 0.269                 | 0.079            | 10.39 (8.00, 13.79)         | 10.80 (8.00, 13.68)              | 0.718            | 0.016        |
| VAT, cm <sup>2</sup>         | 97.50 (71.55, 132.75)    | 95.70 (64.07, 129.62)         | 0.452                 | 0.088            | 106.59 (79.00, 144.00)      | 104.19 (74.81, 134.40)           | 0.257            | 0.178        |
| marriage, n (%)              |                          |                               | <b>0.015</b>          | <b>0.317</b>     |                             |                                  | 0.151            | <b>0.242</b> |
| Married                      | 151 (69.27)              | 155 (73.11)                   |                       |                  | 166.2 (73.01)               | 148.2 (72.84)                    |                  |              |
| Single                       | 22 (10.10)               | 33 (15.57)                    |                       |                  | 18.2 (8.00)                 | 25.9 (12.73)                     |                  |              |
| Divorced                     | 8 (3.67)                 | 8 (3.77)                      |                       |                  | 7.2 (3.16)                  | 9.6 (4.72)                       |                  |              |
| Widowed                      | 37 (16.97)               | 16 (7.55)                     |                       |                  | 36.0 (15.81)                | 19.6 (9.63)                      |                  |              |
| smoking, n (%)               | 13 (5.96)                | 13 (6.13)                     | 0.942                 | 0.007            | 11.6 (5.10)                 | 10.2 (5.01)                      | 0.961            | 0.004        |
| drinking, n (%)              | 24 (11.01)               | 20 (9.43)                     | 0.590                 | 0.052            | 19.7 (8.65)                 | 15.1 (7.42)                      | 0.617            | 0.045        |
| exercise, n (%)              | 130 (59.63)              | 137 (64.62)                   | 0.286                 | 0.103            | 139.0 (61.06)               | 138.3 (67.97)                    | 0.193            | 0.144        |
| Diabetes, n (%)              | 52 (23.85)               | 26 (12.26)                    | <b>0.002</b>          | <b>0.305</b>     | 48.1 (21.13)                | 24.8 (12.19)                     | <b>0.027</b>     | <b>0.242</b> |
| Hypertension, n (%)          | 71 (32.57)               | 58 (27.36)                    | 0.239                 | 0.114            | 75.0 (32.95)                | 71.4 (35.09)                     | 0.694            | 0.046        |

Supplementary Table 1. Baseline characteristic of controls before and after inverse probability weighting (IPW) (continued).

| Variables                     | Before IPW               |                               |              |              | After IPW                   |                                  |              |              |
|-------------------------------|--------------------------|-------------------------------|--------------|--------------|-----------------------------|----------------------------------|--------------|--------------|
|                               | Healthy controls (n=218) | Benign breast nodules (n=212) | <i>P</i>     | SMD          | Healthy controls (n=227.64) | Benign breast nodules (n=203.47) | <i>P</i>     | SMD          |
| Hyperlipidemia, n (%)         | 64 (29.36)               | 35 (16.51)                    | <b>0.002</b> | <b>0.309</b> | 59.7 (26.23)                | 31.1 (15.28)                     | <b>0.009</b> | <b>0.272</b> |
| Coronary heart disease, n (%) | 32 (14.68)               | 19 (8.96)                     | 0.067        | 0.178        | 29.1 (12.78)                | 24.8 (12.19)                     | 0.870        | 0.018        |
| Liver dysfunction, n (%)      | 8 (3.67)                 | 7 (3.30)                      | 0.835        | 0.020        | 15.7 (6.90)                 | 15.9 (7.81)                      | 0.831        | 0.034        |
| Renal dysfunction, n (%)      | 10 (4.59)                | 5 (2.36)                      | 0.208        | 0.122        | 16.6 (7.29)                 | 7.8 (3.83)                       | 0.258        | 0.151        |
| HOMA-IR                       | 2.06 (1.23, 3.29)        | 2.04 (1.21, 3.16)             | 0.748        | 0.021        | 2.29 (1.38, 4.33)           | 2.29 (1.36, 4.02)                | 0.699        | 0.062        |
| TC, mmol/L                    | 4.72 (4.13, 5.56)        | 4.76 (4.20, 5.31)             | 0.688        | 0.079        | 4.79 (4.16, 5.67)           | 4.86 (4.20, 5.42)                | 0.712        | 0.083        |
| TG, mmol/L                    | 1.15 (0.81, 1.62)        | 1.03 (0.68, 1.61)             | 0.112        | 0.011        | 1.25 (0.86, 1.77)           | 1.19 (0.73, 1.74)                | 0.382        | 0.026        |
| HDL, mmol/L                   | 1.35 (1.11, 1.63)        | 1.37 (1.17, 1.65)             | 0.720        | 0.042        | 1.32 (1.09, 1.56)           | 1.34 (1.16, 1.59)                | 0.641        | 0.017        |
| LDL, mmol/L                   | 2.77 (2.26, 3.33)        | 2.72 (2.35, 3.24)             | 0.951        | 0.041        | 2.84 (2.27, 3.44)           | 2.89 (2.44, 3.31)                | 0.944        | 0.058        |
| FFA, mmol/L                   | 622.50 (459.00, 877.62)  | 660.60 (474.78, 822.02)       | 0.837        | 0.001        | 615.91 (425.54, 878.41)     | 692.40 (471.52, 841.39)          | 0.409        | 0.062        |

<sup>a</sup> Mann-Whitney test and independent-samples t test were used for continuous variables and chi-square test and Fisher's exact test were used for categorical variables.

<sup>b</sup> SMD: Standardized mean difference, BMI: Body mass index, FP: Fat percentage, FM: Fat mass, FFM: Fat-free mass, MM: Muscle mass, LMM: Limb muscle mass, TMM: Trunk muscle mass, LFM: Limb fat mass, TFM: Trunk fat mass, VAT: Visceral adipose tissue, HOMA-IR: Homeostatic model assessment of insulin resistance, TC: Total cholesterol, TG: Triglyceride, HDL: High-density lipoprotein, LDL: Low-density lipoprotein, FFA: Free fatty acid.

p-values less than 0.05 and SMDs larger than 0.2 are shown in bold.

Supplementary Table 2. Baseline characteristic of patients with breast cancer after radical mastectomy.

| Variables                            | Total (n=187)           | Pre-menopause (n=27)    | Post-menopause (n=160)  | P <sup>a</sup> |
|--------------------------------------|-------------------------|-------------------------|-------------------------|----------------|
| Age, yr                              | 66.00 (59.00, 71.00)    | 45.59±9.51              | 67.04±7.45              | <0.001         |
| Menopause, n (%)                     | 160 (85.56)             | 0 (0.00)                | 160 (100.00)            | <0.001         |
| BMI <sup>b</sup> , kg/m <sup>2</sup> | 24.89 (22.88, 27.70)    | 23.07 (22.47, 27.25)    | 25.05 (23.06, 27.74)    | 0.181          |
| Overweight, n (%)                    | 75 (40.11)              | 8 (29.63)               | 67 (41.88)              | 0.230          |
| Obesity, n (%)                       | 42 (22.46)              | 5 (18.52)               | 37 (23.13)              | 0.596          |
| Overweight or Obesity, n (%)         | 117 (62.57)             | 13 (48.15)              | 104 (65.00)             | 0.094          |
| FP, %                                | 36.06±6.48              | 34.49±7.57              | 36.33±6.27              | 0.173          |
| FM, kg                               | 23.10 (18.95, 27.80)    | 21.90 (17.80, 27.80)    | 23.20 (19.53, 27.75)    | 0.296          |
| FFM, kg                              | 41.40 (38.75, 44.25)    | 42.10 (39.70, 43.90)    | 41.05 (38.50, 44.30)    | 0.255          |
| MM, kg                               | 38.80 (36.60, 41.60)    | 39.70 (37.70, 41.45)    | 38.70 (36.38, 41.60)    | 0.147          |
| LMM, kg                              | 16.60 (15.20, 18.15)    | 17.40 (16.10, 18.20)    | 16.40 (15.17, 18.02)    | <b>0.046</b>   |
| TMM, kg                              | 20.50 (18.70, 22.20)    | 20.80 (19.25, 21.40)    | 20.30 (18.30, 22.60)    | 0.606          |
| LFM, kg                              | 9.80 (8.15, 11.85)      | 9.60 (7.55, 11.45)      | 9.90 (8.20, 11.93)      | 0.324          |
| TFM, kg                              | 12.20 (9.75, 14.85)     | 11.20 (9.10, 15.05)     | 12.40 (10.30, 14.75)    | 0.235          |
| VAT, cm <sup>2</sup>                 | 128.60 (96.55, 149.85)  | 118.00 (77.45, 141.60)  | 130.00 (99.75, 150.25)  | <b>0.068</b>   |
| marriage, n (%)                      |                         |                         |                         | 0.500          |
| Married                              | 134 (71.66)             | 21 (77.78)              | 113 (70.63)             |                |
| Single                               | 15 (8.02)               | 2 (7.41)                | 13 (8.13)               |                |
| Divorced                             | 8 (4.28)                | 2 (7.41)                | 6 (3.75)                |                |
| Widowed                              | 30 (16.04)              | 2 (7.41)                | 28 (17.50)              |                |
| smoking, n (%)                       | 13 (6.95)               | 3 (11.11)               | 10 (6.25)               | 0.610          |
| drinking, n (%)                      | 9 (4.81)                | 1 (3.70)                | 8 (5.00)                | 1.000          |
| exercise, n (%)                      | 132 (70.59)             | 15 (55.56)              | 117 (73.13)             | 0.104          |
| Diabetes, n (%)                      | 44 (23.53)              | 8 (29.63)               | 36 (22.50)              | 0.574          |
| Hypertension, n (%)                  | 113 (60.43)             | 14 (51.85)              | 99 (61.88)              | 0.440          |
| Hyperlipidemia, n (%)                | 35 (18.72)              | 4 (14.81)               | 31 (19.38)              | 0.768          |
| Coronary heart disease, n (%)        | 28 (14.97)              | 1 (3.70)                | 27 (16.88)              | 0.138          |
| Liver dysfunction, n (%)             | 64 (34.22)              | 10 (37.04)              | 54 (33.75)              | 0.910          |
| Renal dysfunction, n (%)             | 52 (27.81)              | 7 (25.93)               | 45 (28.13)              | 0.997          |
| HOMA-IR                              | 3.08 (1.74, 6.52)       | 2.03 (1.33, 4.77)       | 3.29 (1.87, 6.87)       | 0.082          |
| TC, mmol/L                           | 4.90 (4.10, 5.67)       | 4.40 (3.88, 4.93)       | 5.00 (4.10, 5.77)       | <b>0.006</b>   |
| TG, mmol/L                           | 1.38 (1.02, 1.86)       | 1.24 (0.75, 1.77)       | 1.43 (1.02, 1.86)       | 0.121          |
| HDL, mmol/L                          | 1.26 (1.00, 1.45)       | 1.37 (1.20, 1.49)       | 1.22 (0.99, 1.45)       | 0.117          |
| LDL, mmol/L                          | 3.05 (2.41, 3.59)       | 2.62 (2.27, 3.01)       | 3.17 (2.47, 3.70)       | <b>0.005</b>   |
| FFA, mmol/L                          | 709.60 (491.05, 902.65) | 811.00 (608.85, 960.40) | 701.55 (475.05, 885.60) | 0.112          |
| CEA, ng/ml                           | 2.07 (1.39, 3.28)       | 1.56 (0.84, 2.08)       | 2.13 (1.42, 3.46)       | <b>0.011</b>   |
| CA 199, u/ml                         | 11.90 (7.43, 21.80)     | 12.40 (5.74, 22.47)     | 11.75 (7.79, 21.30)     | 0.649          |
| CA 724, u/ml                         | 1.59 (1.45, 3.56)       | 2.21 (1.33, 5.89)       | 1.56 (1.48, 3.34)       | 0.522          |
| CA 153, u/ml                         | 11.00 (7.41, 16.30)     | 11.70 (6.78, 15.85)     | 11.00 (7.43, 16.44)     | 0.892          |

Supplementary Table 2. Baseline characteristic of patients with breast cancer after radical mastectomy (continued).

| Variables                                         | Total (n=187)        | Pre-menopause (n=27) | Post-menopause (n=160) | P     |
|---------------------------------------------------|----------------------|----------------------|------------------------|-------|
| <b>Albumin, g/L</b>                               | 44.60 (42.45, 46.85) | 46.00 (42.80, 49.00) | 44.45 (42.32, 46.42)   | 0.116 |
| <b>Lymphocyte, 10<sup>9</sup>/L</b>               | 1.51 (1.21, 1.89)    | 1.40 (1.14, 1.98)    | 1.51 (1.21, 1.88)      | 0.424 |
| <b>Neutrophils, 10<sup>9</sup>/L</b>              | 3.79 (3.10, 4.59)    | 3.77 (3.17, 4.93)    | 3.79 (3.10, 4.46)      | 0.368 |
| <b>TNM, n (%)</b>                                 |                      |                      |                        | 0.636 |
| 0                                                 | 2 (1.07)             | 0 (0.00)             | 2 (1.25)               |       |
| I                                                 | 48 (25.67)           | 9 (33.33)            | 39 (24.38)             |       |
| II                                                | 109 (58.29)          | 14 (51.85)           | 95 (59.38)             |       |
| III                                               | 22 (11.76)           | 4 (14.81)            | 18 (11.25)             |       |
| IV                                                | 6 (3.21)             | 0 (0.00)             | 6 (3.75)               |       |
| <b>Pathology, n (%)</b>                           |                      |                      |                        | 0.701 |
| Carcinoma in situ                                 | 14 (7.49)            | 2 (7.41)             | 12 (7.50)              |       |
| Infiltrating carcinoma                            | 165 (88.24)          | 25 (92.59)           | 140 (87.50)            |       |
| Sarcoma & metaplastic carcinoma & Phyllodes tumor | 2 (1.07)             | 0 (0.00)             | 2 (1.25)               |       |
| Others                                            | 6 (3.21)             | 0 (0.00)             | 6 (3.75)               |       |
| <b>Histological grade, n (%)</b>                  |                      |                      |                        | 0.269 |
| 0                                                 | 54 (28.88)           | 12 (44.44)           | 42 (26.25)             |       |
| I                                                 | 8 (4.28)             | 1 (3.70)             | 7 (4.38)               |       |
| II                                                | 79 (42.25)           | 8 (29.63)            | 71 (44.38)             |       |
| III                                               | 46 (24.60)           | 6 (22.22)            | 40 (25.00)             |       |
| <b>Tumor long diameter, mm</b>                    | 23.00 (16.00, 33.00) | 25.00 (16.00, 40.00) | 23.00 (16.00, 32.00)   | 0.419 |
| <b>ER, n (%)</b>                                  |                      |                      |                        | 0.660 |
| Positive                                          | 128 (68.45)          | 17 (62.96)           | 111 (69.38)            |       |
| Negative                                          | 59 (31.55)           | 10 (37.04)           | 49 (30.63)             |       |
| <b>PR, n (%)</b>                                  |                      |                      |                        | 1.000 |
| Positive                                          | 123 (65.78)          | 18 (66.67)           | 105 (65.63)            |       |
| Negative                                          | 64 (34.22)           | 9 (33.33)            | 55 (34.38)             |       |
| <b>HER<sup>2</sup>, n (%)</b>                     |                      |                      |                        | 0.050 |
| 3 <sup>+</sup>                                    | 37 (19.79)           | 10 (37.04)           | 27 (16.88)             |       |
| 2 <sup>+</sup>                                    | 68 (36.36)           | 7 (25.93)            | 61 (38.13)             |       |
| 1 <sup>+</sup>                                    | 24 (12.83)           | 1 (3.70)             | 23 (14.38)             |       |
| Negative                                          | 58 (31.02)           | 9 (33.33)            | 49 (30.63)             |       |
| <b>Ki-67, n (%)</b>                               |                      |                      |                        | 1.000 |
| Positive                                          | 185 (98.93)          | 27 (100.00)          | 158 (98.75)            |       |
| Negative                                          | 2 (1.07)             | 0 (0.00)             | 2 (1.25)               |       |
| <b>Lymph node infiltration, n (%)</b>             | 78 (41.71)           | 12 (44.44)           | 66 (41.25)             | 0.920 |
| <b>Pre-surgery therapy, n (%)</b>                 | 46 (24.60)           | 9 (33.33)            | 37 (23.13)             | 0.369 |
| <b>Post-surgery therapy, n (%)</b>                | 123 (65.78)          | 19 (70.37)           | 104 (65.00)            | 0.745 |
| <b>Distant metastasis, n (%)</b>                  | 10 (5.35)            | 2 (7.41)             | 8 (5.00)               | 0.607 |

**Supplementary Table 2. Baseline characteristic of patients with breast cancer after radical mastectomy (continued).**

| <b>Variables</b>                                         | <b>Total (n=187)</b> | <b>Pre-menopause<br/>(n=27)</b> | <b>Post-menopause<br/>(n=160)</b> | <b>P</b> |
|----------------------------------------------------------|----------------------|---------------------------------|-----------------------------------|----------|
| <b>Distant metastasis-free survival time,<br/>months</b> | 17.00 (10.00, 33.00) | 23.00 (11.00, 44.50)            | 17.00 (9.00, 29.00)               | 0.197    |

<sup>a</sup> Mann-Whitney test and independent-samples t test were used for continuous variables and Fisher's exact test was used for categorical variables. p-values less than 0.05 were shown in bold

<sup>b</sup> BMI: Body mass index, FP: Fat percentage, FM: Fat mass, FFM: Fat-free mass, MM: Muscle mass, LMM: Limb muscle mass, TMM: Trunk muscle mass, LFM: Limb fat mass, TFM: Trunk fat mass, VAT: Visceral adipose tissue, HOMA: Homeostatic model assessment of insulin resistance, TC: Total cholesterol, TG: Triglyceride, HDL: High-density lipoprotein, LDL: Low-density lipoprotein, FFA: Free fatty acid, CEA: Carcinoembryonic antigen, CA: Carbohydrate antigen, ER: Estrogen receptor, PR: Progesterone receptor

**Supplementary Table 3. The association of body composition and distant metastasis in patients with breast cancer post-radical mastectomy<sup>a</sup>.**

| Variables            | Overall              |              | Post-menopause       |       | Follow up ≥2yr       |              |
|----------------------|----------------------|--------------|----------------------|-------|----------------------|--------------|
|                      | HR (95%CI)           | P            | HR (95%CI)           | P     | HR (95%CI)           | P            |
| FP, % <sup>b</sup>   | 0.922 (0.837, 1.016) | 0.100        | 0.919 (0.821, 1.029) | 0.145 | 0.780 (0.622, 0.978) | <b>0.032</b> |
| FM, kg               | 0.914 (0.823, 1.015) | 0.093        | 0.923 (0.821, 1.039) | 0.184 | 0.762 (0.598, 0.971) | <b>0.028</b> |
| FFM, kg              | 0.934 (0.814, 1.070) | 0.325        | 0.953 (0.817, 1.112) | 0.542 | 0.883 (0.725, 1.075) | 0.214        |
| MM, kg               | 0.919 (0.791, 1.068) | 0.272        | 0.946 (0.804, 1.114) | 0.505 | 0.861 (0.694, 1.068) | 0.172        |
| LMM, kg              | 0.750 (0.590, 0.953) | <b>0.019</b> | 0.763 (0.579, 1.006) | 0.055 | 0.713 (0.500, 1.019) | 0.063        |
| TMM, kg              | 0.917 (0.732, 1.150) | 0.455        | 0.925 (0.720, 1.189) | 0.543 | 0.821 (0.574, 1.173) | 0.278        |
| LFM, kg              | 0.932 (0.785, 1.011) | 0.417        | 0.969 (0.817, 1.149) | 0.720 | 0.481 (0.263, 0.880) | <b>0.018</b> |
| TFM, kg              | 0.856 (0.712, 1.030) | 0.100        | 0.870 (0.705, 1.075) | 0.197 | 0.639 (0.422, 0.967) | <b>0.034</b> |
| VAT, cm <sup>2</sup> | 0.956 (0.969, 1.002) | 0.094        | 0.987 (0.969, 1.006) | 0.189 | 0.959 (0.923, 0.998) | <b>0.037</b> |

<sup>a</sup> Univariable COX regression was used for analysis. p-values less than 0.05 were shown in bold

<sup>b</sup> FP: Fat percentage, FM: Fat mass, FFM: Fat-free mass, MM: Muscle mass, LMM: Limb muscle mass, TMM: Trunk muscle mass, LFM: Limb fat mass, TFM: Trunk fat mass, VAT: Visceral adipose tissue.
